# Supplementary material
Source: publisher site journal article supplement (https://laamp.iucr.org/__data/assets/pdf_file/0006/136374/Call-Supplement-for-FAST-Team-Applications-2018.pdf)
Supplement: Supplementary file 1 [file Call-Supplement-for-FAST-Team-Applications-2018.pdf]

**SUPPLEMENT TO SECOND CALL FOR APPLICATIONS FOR  
FACULTY-STUDENT TEAMS TO SPEND TWO (2) MONTHS  
DURING CALENDAR YEAR 2018 AT PARTICIPATING  
ADVANCED LIGHT SOURCES**

**DEADLINE: 1 JUNE 2018**

ICSU has awarded the International Union of Pure and Applied Physics (IUPAP) and the International Union of Crystallography (IUCr) a grant to enhance advanced light source (AdLS) and crystallography sciences in five targeted regions of the world: Africa, the Caribbean, Mexico, Southeast Asia and Middle East. Part of that funding will be allocated to send **FAculty-STudent (FAST) Teams** for two (2) months during Calendar Year 2018 to LAAAMP's AdLS Collaborative Partners to participate in learning AdLS beamline techniques, including those involving crystallography.

*Note: Due to the recent expansion of LAAMP to Southeast Asia, thereby becoming Lightsources for Africa, the Americas, Asia and Middle East Project (LAAAMP), this Supplement to the Second Call is restricted to FAST Teams from SE Asia. FAST Teams for 2018 from the other regions already have been awarded.*

We anticipate up to three (3) FAST Teams will be awarded for this Call.

**Who is Eligible?**

**Faculty**

Employed as a full-time faculty member at an accredited Ph.D. granting university that is located in Southeast Asia.

Accompanied by one's Ph.D. student research advisee.

Interested in using AdLSs to further one's research and training endeavors.

Previous experience with using AdLSs is limited to a year or less.

Ability to spend two (2) months during Calendar Year 2018 as a full-time visitor in residence at an AdLS that is a LAAAMP Collaborative Partner.

**Student**

Registered as a full-time Ph.D. student at an accredited university that is located in Southeast Asia.

Accompanied by one's faculty research advisor.

Interested in using AdLSs in one's dissertation research.

Ability to spend two (2) months during Calendar Year 2018 as a full-time visitor in residence at an AdLS that is a *LAAAMP* Collaborative Partner.

**Amount of Financial Support**

*LAAAMP* will provide 1,818.00 Euros per person to cover transportation costs. Any excess will be applied to accommodation and subsistence. The remainder of accommodation and subsistence should be negotiated with the host AdLS and other sources of support.

**Deliverables**

Within one month after the conclusion of the visit to the host AdLS, the FAST Team should provide the following:

1. Maximum 10-page description of the research conducted, including any publications that result.  
***All publications should acknowledge the support provided by IUPAP-IUCr LAAAMP within the ICSU Grants Programme 2016-2019.***
2. Maximum 3-page report that evaluates the non-scientific aspects of the visit, including positive experiences as well as ways that the visit could be enhanced in the future.

**Who are *LAAAMP*'s AdLS Collaborative Partners?**

Advanced Light Source (USA)  
Advanced Photon Source (USA)  
ALBA (Spain)  
Australian Synchrotron  
Canadian Light Source  
DELTA (Germany)  
Elettra (Italy)  
European Synchrotron Radiation Facility (France)  
National Synchrotron Light Source-II (USA)  
Photon Factory (Japan)  
SESAME (Jordan)  
Siam Photon Source (Thailand)  
Stanford Synchrotron Radiation Lightsource (USA)  
Taiwan Photon Source

**To What Person and Email Address Should Applications be Submitted?**

**Dr. Rungrueang Phatthanakun**

Head of Research Facility

Synchrotron Light Research Institute (SLRI)

111 University Avenue

Muang District, Nakhon Ratchasima 30000, THAILAND

Postal address : P.O. Box 93, Muang, Nakhon Ratchasima 30000, THAILAND

**Email: [rungrueang@slri.or.th](mailto:rungrueang@slri.or.th)**

**Note: Final funding is dependent upon suitable arrangements being made with a *LAAAMP* AdLS Collaborative Partner.**

# APPLICATION

**(Submit only one (1) Application for each FAST Team)**

## Personal Information

### Faculty

Name:

Title:

Department:

Institution:

Address:

Email:

Office Phone Number:

Mobile Phone Number:

Fax number:

Website:

### Student

Name:

Email Address:

Mobile Phone Number:

## Research Information

Please provide the information below:

1. Maximum two-page description of your research to be initiated or enhanced by the visit to the AdLS, identifying the specific AdLS, staff mentor, beamline and instrumentations to be utilized. Make clear whether this is a new research direction for you.
2. Note of acknowledgement from an AdLS staff member that she/he will serve in the role of mentor.

**Important: This acknowledgement should be obtained before submitting an application.**

3. Up to three (3) of the faculty's most significant publications.

Faculty's Electronic Signature:

Date:

Student's Electronic Signature:

Date:
